# Supplementary material for: Iron catalyzed CO2hydrogenation to formate enhanced by Lewis acid co-catalysts
Source: Royal Society of Chemistry journal article supplement (doi:10.1039/c5sc01467k), 2015-01-01
Supplement: c5sc01467k1.pdf [file c5sc01467k1.pdf]

## **Supporting Information: Iron Catalyzed CO<sub>2</sub> Hydrogenation to Formate Enhanced by Lewis Acid Co-Catalysts**

Yuanyuan Zhang,<sup>a</sup> Alex D. MacIntosh,<sup>a</sup> Janice L. Wong,<sup>b</sup> Elizabeth A. Bielinski,<sup>b</sup> Paul G. Williard,<sup>a</sup> Brandon Q. Mercado<sup>b</sup>, Nilay Hazari<sup>b,\*</sup> and Wesley H. Bernskoetter<sup>a,\*</sup>

<sup>a</sup>*The Department of Chemistry, Brown University, Providence, RI 02912*

<sup>b</sup>*The Department of Chemistry, Yale University, New Haven, CT 06520*

e-mail: nilay.hazari@yale.edu; wb36@brown.edu

### **Table of Contents:**

|                                                      |     |
|------------------------------------------------------|-----|
| General Experimental Methods and Characterizing Data | S2  |
| Tables of Base Screening and Lewis Acid Loading      | S8  |
| Experimental Descriptions and NMR Spectral Data      | S9  |
| X-ray Crystallography                                | S22 |
| References                                           | S25 |

## General Experimental Methods and Characterizing Data

**General Considerations.** All manipulations were carried out using standard vacuum, Schlenk, cannula, or glovebox techniques. Hydrogen and carbon dioxide were purchased from Corp Brothers and used as received. Compounds **1a**, **1b**, **HCO<sub>2</sub>-1a** and **2a** were prepared according to literature procedures.<sup>1</sup> Compounds (<sup>i</sup>PrPN<sup>Me</sup>P)Fe(H)BH<sub>4</sub>, **3a** and **4a** were prepared in a manner similar to that described by Beller and coworkers, but with the slight modifications described below. The ligand MeN{CH<sub>2</sub>CH<sub>2</sub>(PCy<sub>2</sub>)}<sub>2</sub> was also prepared by analogy to a previous report, only substituting LiPCy<sub>2</sub> for LiP<sup>i</sup>Pr<sub>2</sub>.<sup>1a,1b</sup> All other chemicals were purchased from Aldrich, Fisher, VWR, Strem, or Cambridge Isotope Laboratories. Non-volatile solids, surely including Cs<sub>2</sub>CO<sub>3</sub>, were dried under vacuum at 50 °C overnight. 1,8-diazabicycloundec-7-ene (DBU) was dried over CaH<sub>2</sub> and distilled prior to use. Solvents were dried and deoxygenated using literature procedures.<sup>2</sup> <sup>1</sup>H, <sup>13</sup>C and <sup>31</sup>P NMR spectra were recorded on Bruker DRX 400 MHz, Avance 300 and 600 MHz spectrometers at ambient temperature, unless otherwise noted. <sup>1</sup>H and <sup>13</sup>C chemical shifts are referenced to residual solvent signals; <sup>31</sup>P and <sup>7</sup>Li chemical shifts are referenced to the external standards of H<sub>3</sub>PO<sub>4</sub> and LiCl, respectively. Probe temperatures were calibrated using ethylene glycol and methanol as previously described.<sup>3</sup> It should be noted that some NMR experiments employed a J. Young NMR tube with up to 3 atm of total pressure and appropriate safety precautions need to be applied if reproducing these experiments. IR spectra were recorded on Jasco 4100 FTIR and Mettler Toledo React IR spectrometers. X-ray crystallographic data were collected on a Bruker D8 QUEST diffractometer. Samples were collected in inert oil and quickly transferred to a cold gas stream. The structures were solved from direct methods and Fourier syntheses and refined by full-matrix least-squares procedures with anisotropic thermal parameters for all non-hydrogen atoms. Crystallographic calculations

were carried out using SHELXTL. The crystal data has been deposited in the CCDC under the following reference numbers: ( $i\text{PrPN}^{\text{MeP}}\text{FeCl}_2$ ) (1061151), ( $i\text{PrPN}^{\text{MeP}}\text{Fe(H)BH}_4$ ) (1061152), **3a** (1061153), **4a** (1061154 and 1061155), **5a** (1061156), and **CO<sub>2</sub>-1a** (1061157). High pressure catalytic CO<sub>2</sub> hydrogenation reactions were performed using a Parr 5500 series compact reactor with glass insert. Elemental analyses were performed at Atlantic Microlab, Inc., in Norcross, GA or Robertson Microlit Laboratory in Ledgewood, NJ.

**Preparation of CO<sub>2</sub>-1a.** A J. Young NMR tube was charged with ( $i\text{PrPNP}\text{Fe(H)CO}$ ) (**1a**) (20 mg, 0.051 mmol) in 2 mL pentane. The sample was frozen at -198 °C, degassed, and 1 atm of carbon dioxide admitted to the tube. Upon warming to ambient temperature, the color immediately changed from magenta to yellow. After 5 minutes, the excess carbon dioxide gas was removed *in vacuo*, leaving approximately 1 mL of the product solution in the tube. The mixture was then decanted, concentrated to approximately 0.5 mL, and cooled to -35 °C overnight to afford 19 mg (85%) of **CO<sub>2</sub>-1a** as yellow-orange crystals. <sup>1</sup>H NMR (C<sub>6</sub>D<sub>6</sub>): δ -25.44 (t, 53.9 Hz, 1H, Fe-H), 0.80 (m, 6H, CH(CH<sub>3</sub>)<sub>2</sub>), 1.02 (m, 6H, CH(CH<sub>3</sub>)<sub>2</sub>), 1.09 (m, 6H, CH(CH<sub>3</sub>)<sub>2</sub>), 1.19 (m, 6H, CH(CH<sub>3</sub>)<sub>2</sub>), 1.36 (m, 2H, PCH<sub>2</sub>), 1.71 (m, 2H, PCH<sub>2</sub>), 1.77 (m, 2H, CH(CH<sub>3</sub>)<sub>2</sub>), 1.98 (m, 2H, NCH<sub>2</sub>), 2.13 (m, 2H, CH(CH<sub>3</sub>)<sub>2</sub>), 3.29 (m, 2H, NCH<sub>2</sub>). <sup>13</sup>C{<sup>1</sup>H} NMR (C<sub>6</sub>D<sub>6</sub>): δ 18.79, 19.18, 19.24, 19.29, 23.71, 26.21, 26.77, 56.06 (t, 4.0 Hz), 165.37 (CO<sub>2</sub>), 236.65 (Fe-CO). <sup>31</sup>P{<sup>1</sup>H} NMR (C<sub>6</sub>D<sub>6</sub>): δ 96.03 (s). IR (KBr): 1891 (C≡O), 1727 (O=C).

**Preparation of ( $i\text{PrPN}^{\text{MeP}}\text{FeCl}_2$ ).** FeCl<sub>2</sub> (167 mg, 1.32 mmol) was added to a 40 mL THF solution of MeN{CH<sub>2</sub>CH<sub>2</sub>P(*i*Pr)<sub>2</sub>}<sub>2</sub> (421 mg, 1.32 mmol) at ambient temperature and stirred for 11 hours. The resulting yellow solution was then filtered, the filtrate concentrated to 10 mL and layered with approximately 5 mL pentane. Cooling overnight at -35 °C afforded 378 mg (64%) of ( $i\text{PrPN}^{\text{MeP}}\text{FeCl}_2$ ) as a colorless crystalline solid. Magnetic susceptibility: 4.72 μB (Evans'

Method).  $^1\text{H}$  NMR ( $\text{THF-}d_8$ ):  $\delta$  73.9, 63.1, 46.8, 4.36, 2.98. Anal. Calcd. for  $\text{C}_{17}\text{H}_{39}\text{Cl}_2\text{FeNP}_2$ : C, 45.76%; H, 8.81%, N, 3.14%. Found: C, 45.57%, 8.54%, 3.02%.

**Preparation of  $(\text{CyPN}^{\text{MeP}})\text{FeCl}_2$ .** This compound was prepared in a manner identical to  $(\text{iPrPN}^{\text{MeP}})\text{FeCl}_2$  using  $\text{MeN}\{\text{CH}_2\text{CH}_2\text{P}(\text{Cy})_2\}_2$  (210 mg, 0.438 mmol) and  $\text{FeCl}_2$  (52 mg, 0.410 mmol) which afforded 244 mg (98%) of a colorless powder. Magnetic susceptibility:  $4.96 \mu\text{B}$  (Evans' Method).  $^1\text{H}$  NMR ( $\text{C}_6\text{D}_6$ ):  $\delta$  69.7, 55.6, 6.57, 4.86, 0.81, -0.13, -2.48, -5.18. Anal. Calcd. for  $\text{C}_{29}\text{H}_{55}\text{Cl}_2\text{FeNP}_2$ : C, 57.43%; H, 9.14%, N, 2.31%. Found: C, 57.52%, 8.86%, 2.31%.

**Preparation of  $(\text{CyPN}^{\text{MeP}})\text{Fe}(\text{H})(\text{BH}_4)$ .**  $(\text{CyPN}^{\text{MeP}})\text{FeCl}_2$  (159 mg, 0.262 mmol) was dissolved in a solvent mixture containing 5 mL acetonitrile and 15 mL ethanol to provide a red-purple solution. Upon cooling the solution in an ice-water bath, excess  $\text{NaBH}_4$  (117 mg, 3.14 mmol) was added in one portion. Gas evolution was immediately observed and the solution turned brown. After stirring at ambient temperature for one hour, the brown reaction mixture was placed under reduced pressure to remove the volatiles. The residue was triturated with pentane ( $3 \times 5$  mL), extracted with 15 mL of pentane, and the dark brown solution concentrated. Cooling to  $-35^\circ\text{C}$  overnight afforded 101 mg (70%) of  $(\text{CyPN}^{\text{MeP}})\text{Fe}(\text{H})(\text{BH}_4)$  as brown crystals. The same procedure was also used to obtain  $(\text{iPrPN}^{\text{MeP}})\text{Fe}(\text{H})(\text{BH}_4)$  which was identified by comparison to previously reported NMR spectra. Characterization data for  $(\text{CyPN}^{\text{MeP}})\text{Fe}(\text{H})(\text{BH}_4)$ : Anal. Calcd. for  $\text{C}_{29}\text{H}_{60}\text{BFeNP}_2$ : C, 63.17%; H, 10.97%, N 2.54%. Found: C, 63.39; H, 11.00%; N, 2.61%.  $^1\text{H}$  NMR ( $\text{C}_6\text{D}_6$ ):  $\delta$  -35.95 (br, 1H, Fe-*H*-B), -23.00 (t, 53.1 Hz, 1H, Fe-*H*), -11.95 (br, 1H, Fe-*H*-B), 1.22-1.55 (m, 22H,  $\text{PCy}_2$ ), 1.58 (s, 3H,  $\text{NCH}_3$ ), 1.59-1.69 (m, 6H,  $\text{PCy}_2$ ), 1.71-1.84 (m, 8H,  $\text{PCy}_2$ ), 1.90-1.92 (m, 4H,  $\text{PCy}_2$ ), 1.92-1.95 (m, 2H,  $\text{CH}_2$ ), 2.30 (m, 2H,  $\text{CH}_2$ ), 2.31 (m, 2H,  $\text{PCy}_2$ ), 2.51 (m, 2H,  $\text{CH}_2$ ), 2.75 (m, 2H,  $\text{PCy}_2$ ), 3.27 (m, 2H,  $\text{CH}_2$ ), 4.36 (b, 2H,  $\text{BH}_2$ ).  $^{13}\text{C}$   $\{^1\text{H}\}$  NMR

(C<sub>6</sub>D<sub>6</sub>):  $\delta$  27.77, 27.80, 27.84, 27.91, 28.14, 28.21, 28.46, 28.49, 29.21, 29.68, 30.82, 36.31 (PCy<sub>2</sub>), 29.71, 66.58 (CH<sub>2</sub>) 50.61 (NCH<sub>3</sub>). <sup>31</sup>P {<sup>1</sup>H} NMR (C<sub>6</sub>D<sub>6</sub>):  $\delta$  87.2 (s, PCy<sub>2</sub>).

**Preparation of (CyPN<sup>Me</sup>P)Fe(H)CO(BH<sub>4</sub>) (3b).** A 25 mL heavy walled glass vessel was charged with (CyPN<sup>Me</sup>P)Fe(H)BH<sub>4</sub> (39 mg, 0.071 mmol) in 8 mL pentane. The sample was frozen at -198 °C, degassed, and 1 atm of carbon monoxide admitted to the vessel. Upon warming to ambient temperature the color changed from brown to yellow and within 30 minutes yellow crystalline solids precipitated. Most of the volatiles were removed quickly under vacuum, leaving approximately 3 mL pentane in the vessel. Under N<sub>2</sub> the mixture was decanted and the yellow crystalline residue was washed with 2×3 mL of pentane. Following air-drying, the yellow solid was briefly dried under vacuum (less than 5 minutes) to afford 38 mg (92%) of **3b**. The same procedure was also used to obtain (iPrPN<sup>Me</sup>P)Fe(H)CO(BH<sub>4</sub>) (**3a**) which was identified by comparison to previously reported NMR spectra.<sup>1a,1b</sup> Characterization data for (CyPN<sup>Me</sup>P)Fe(H)CO(BH<sub>4</sub>) (**3b**): Anal. Calcd. for C<sub>30</sub>H<sub>60</sub>BFeNOP<sub>2</sub>: C, 62.19%; H, 10.44%, N, 2.42%. Found: C, 61.98; H, 10.18%; N, 2.24%. <sup>1</sup>H NMR (C<sub>6</sub>D<sub>6</sub>):  $\delta$  -19.60 (t, 52.8 Hz, 1H, Fe-H), -2.54 (br, 4H, BH<sub>4</sub>), 1.21-1.25 (m, 8H, PCy<sub>2</sub>), 1.40-1.47 (m, 4H, PCy<sub>2</sub>), 1.55-1.99 (m, 32H, CH<sub>2</sub> & PCy<sub>2</sub>), 2.01 (s, 3H, NH<sub>3</sub>), 2.02 (m, 2H, PCy<sub>2</sub>), 2.18 (m, 2H, CH<sub>2</sub>), 2.74 (m, 2H, PCy<sub>2</sub>), 3.07 (m, 2H, CH<sub>2</sub>). <sup>13</sup>C {<sup>1</sup>H} NMR (C<sub>6</sub>D<sub>6</sub>):  $\delta$  27.26, 27.30, 27.35, 27.65, 27.91, 28.21, 28.25, 28.94, 29.10, 31.48, 37.13, 41.81 (PCy<sub>2</sub>), 50.94 (NCH<sub>3</sub>), 31.06, 66.00 (CH<sub>2</sub>), CO resonance not located. <sup>31</sup>P {<sup>1</sup>H} NMR (C<sub>6</sub>D<sub>6</sub>):  $\delta$  85.40 (s, PCy<sub>2</sub>).

**Preparation of (iPrPN<sup>Me</sup>P)Fe(H)<sub>2</sub>CO (4a).** A 20 mL scintillation vial was charged with (iPrPN<sup>Me</sup>P)Fe(H)CO(BH<sub>4</sub>) (**3a**) (20 mg, 0.048 mmol) in 5 mL of THF. Excess NEt<sub>3</sub> (approximately 500  $\mu$ L) was added to the solution and stirred for 20 minutes. The volatiles were then removed under vacuum and the residue extracted with 2 mL of pentane. Cooling the

solution to -35 °C overnight afforded 16 mg (89%) of **4a** as yellow needles. The compound was characterized by comparison to previously reported NMR spectra.<sup>1a,1b</sup>

**Preparation of (iPrPN<sup>Me</sup>P)Fe(H)CO(HCO<sub>2</sub>) (5a).** A J. Young NMR tube was charged with (iPrPN<sup>Me</sup>P)Fe(H)<sub>2</sub>CO (**4a**) (30 mg, 0.074 mmol) in 1 mL of C<sub>6</sub>D<sub>6</sub>. The sample was frozen at -198 °C, degassed, and 1 atm of carbon dioxide admitted to the tube. The tube was warmed to ambient temperature and allowed to sit for approximately 20 minutes. The volatiles were removed *in vacuo*, leaving a yellow residue. The residue was extracted with pentane (3×2 mL), concentrated to approximately 1 mL, and cooled to -35 °C overnight to afford 30 mg (90%) of **5a** as yellow crystals. Anal. Calcd. for C<sub>19</sub>H<sub>41</sub>FeNO<sub>3</sub>P<sub>2</sub>: C, 50.79%; H, 9.20%; N, 3.12%. Found: C, 50.72%; H, 8.47%; N, 3.04%. *Major Isomer*: <sup>1</sup>H NMR (C<sub>6</sub>D<sub>6</sub>): δ -23.89 (t, 52Hz, 1H, Fe-H), 0.90 (m, 6H, CH(CH<sub>3</sub>)<sub>2</sub>), 1.13 (m, 6H, CH(CH<sub>3</sub>)<sub>2</sub>), 1.18 (m, 6H, CH(CH<sub>3</sub>)<sub>2</sub>), 1.45 (m, 6H, CH(CH<sub>3</sub>)<sub>2</sub>), 1.51-1.58 (m, 4H, CH(CH<sub>3</sub>)<sub>2</sub>), 1.83 (s, 3H, CH<sub>3</sub>), 1.96-2.10 (m, 6H), 2.31 (m, 2H), 9.22 (s, 1H, HCO<sub>2</sub>). <sup>13</sup>C{<sup>1</sup>H} NMR (C<sub>6</sub>D<sub>6</sub>): δ 18.24, 19.35, 20.03, 20.74, 25.95, 26.38, 26.86, 45.32, 65.51, 169.26 (HCO<sub>2</sub>), 223.46 (CO). <sup>31</sup>P{<sup>1</sup>H} NMR (C<sub>6</sub>D<sub>6</sub>): δ 87.23 (s). *Selected data for minor isomer*: <sup>1</sup>H NMR (C<sub>6</sub>D<sub>6</sub>): δ -24.03 (t, 51.4 Hz, 1H, Fe-H), 9.11 (s, 1H, HCO<sub>2</sub>). <sup>13</sup>C{<sup>1</sup>H} NMR (C<sub>6</sub>D<sub>6</sub>): δ 222.64 (CO). <sup>31</sup>P{<sup>1</sup>H} NMR (C<sub>6</sub>D<sub>6</sub>): δ 89.87 (s). Sample spectra containing all peaks for the major and minor isomers are provided later in the Supporting Information.

**General Methods for Catalytic CO<sub>2</sub> Hydrogenation Studies.** In a glovebox, a 50 mL glass reactor liner was charged with catalyst as a stock solution in THF (*ca.* 0.02 M), a corresponding amount of DBU, Lewis acid and 5 mL to 10 mL THF. The cylinder liner was placed into the Parr reactor and the vessel sealed. The reactor was removed from the dry box and pressurized with 69 atm of a 1:1 CO<sub>2</sub>:H<sub>2</sub> mixture at ambient temperature. The reactor was then heated and stirred at 80 °C for the indicated time. The reaction was stopped by removal from the heat source and

venting of the gases. The contents of the reactor were then quickly transferred to a 100 mL round bottom flask with assistance of D<sub>2</sub>O to dissolve the solid products. Then all of the volatiles were removed under reduced pressure. The residue was dissolved in D<sub>2</sub>O, and 10 to 400  $\mu$ L DMF was added as an internal standard for quantification of the formate product by <sup>1</sup>H NMR spectroscopy. Fairly large amounts of D<sub>2</sub>O may be required to completely dissolve the generated formate.

**Table S1. Screening of bases for CO<sub>2</sub> hydrogenation catalyzed by **1b**.<sup>a</sup>**

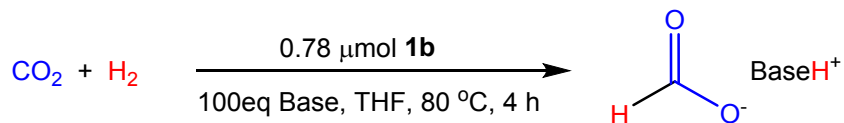

| Base <sup>d</sup>               | TON <sup>b</sup> | Yield (%) <sup>c</sup> |
|---------------------------------|------------------|------------------------|
| KHMDS <sup>c</sup>              | 4                | 4                      |
| KO <sup>t</sup> Bu              | 20               | 20                     |
| Cs <sub>2</sub> CO <sub>3</sub> | 60               | 60                     |
| NEt <sub>3</sub>                | 3                | 3                      |
| Pyridine                        | 1                | 1                      |
| DABCO <sup>c</sup>              | 50               | 50                     |
| DBU <sup>c</sup>                | 80               | 90                     |

<sup>a</sup>Reaction conditions: 69 atm of CO<sub>2</sub>:H<sub>2</sub> (1:1), 0.78 μmol of **1b** in 5 mL THF (*ca.* 0.015 M) at 80 °C.

<sup>b</sup>Formate production quantified by <sup>1</sup>H NMR spectroscopy. <sup>c</sup>KHMDS is potassium bis(trimethylsilyl)amide, DABCO is 1,4-diazabicyclo[2.2.2]octane and DBU is 1,8-Diazabicyclo[5.4.0]undec-7-ene. <sup>d</sup>Et<sub>3</sub>N and pyridine were dried over CaH<sub>2</sub> and molecular sieves respectively and distilled under reduced pressure. DABCO were purified by sublimation (50 °C, 0.02 mbar). DBU was dried over CaH<sub>2</sub> and distilled prior to use. Cs<sub>2</sub>CO<sub>3</sub> was dried under vacuum at 50 °C overnight. <sup>e</sup>Reported yield is based on base (base/formate = 1:1).

**Table S2. Lewis acid optimization for CO<sub>2</sub> hydrogenation catalyzed by **1b**.<sup>a</sup>**

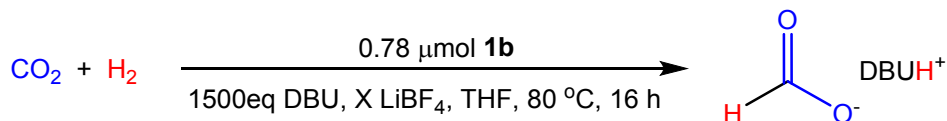

| DBU/LiBF <sub>4</sub> | TON <sup>b</sup>  | Yield (%) <sup>d</sup> |
|-----------------------|-------------------|------------------------|
| no LiBF <sub>4</sub>  | 431 <sup>c</sup>  | 28                     |
| 150/1                 | 541               | 36                     |
| 30/1                  | 693               | 46                     |
| 20/1                  | 784               | 52                     |
| 15/1                  | 930               | 62                     |
| 6/1                   | 1190              | 79                     |
| 5/1                   | 1210              | 80                     |
| 2/1                   | 1230 <sup>c</sup> | 82                     |

<sup>a</sup>Reaction conditions: 69 atm of CO<sub>2</sub>:H<sub>2</sub> (1:1), 0.78 μmol of **1b** in 5 mL THF (*ca.* 0.015 M), 180 mg DBU at 80 °C. <sup>b</sup>Formate production quantified by <sup>1</sup>H NMR spectroscopy. <sup>c</sup>Reported values are the average of three trials. <sup>d</sup>Reported yield is based on base (base/formate = 1:1)



**Treatment of HCO<sub>2</sub>-1a with LiBF<sub>4</sub> and DBU.** A J. Young NMR tube was charged with 3 mg of HCO<sub>2</sub>-1a in approximately 1 mL of THF-*d*<sub>8</sub>. Then, 3 eq of LiBF<sub>4</sub> was added under an N<sub>2</sub> atmosphere. After 20 minutes, approximately 40 eq of DBU was also added. The reaction was monitored by <sup>31</sup>P and <sup>1</sup>H NMR spectroscopy over the course of 16 hours.

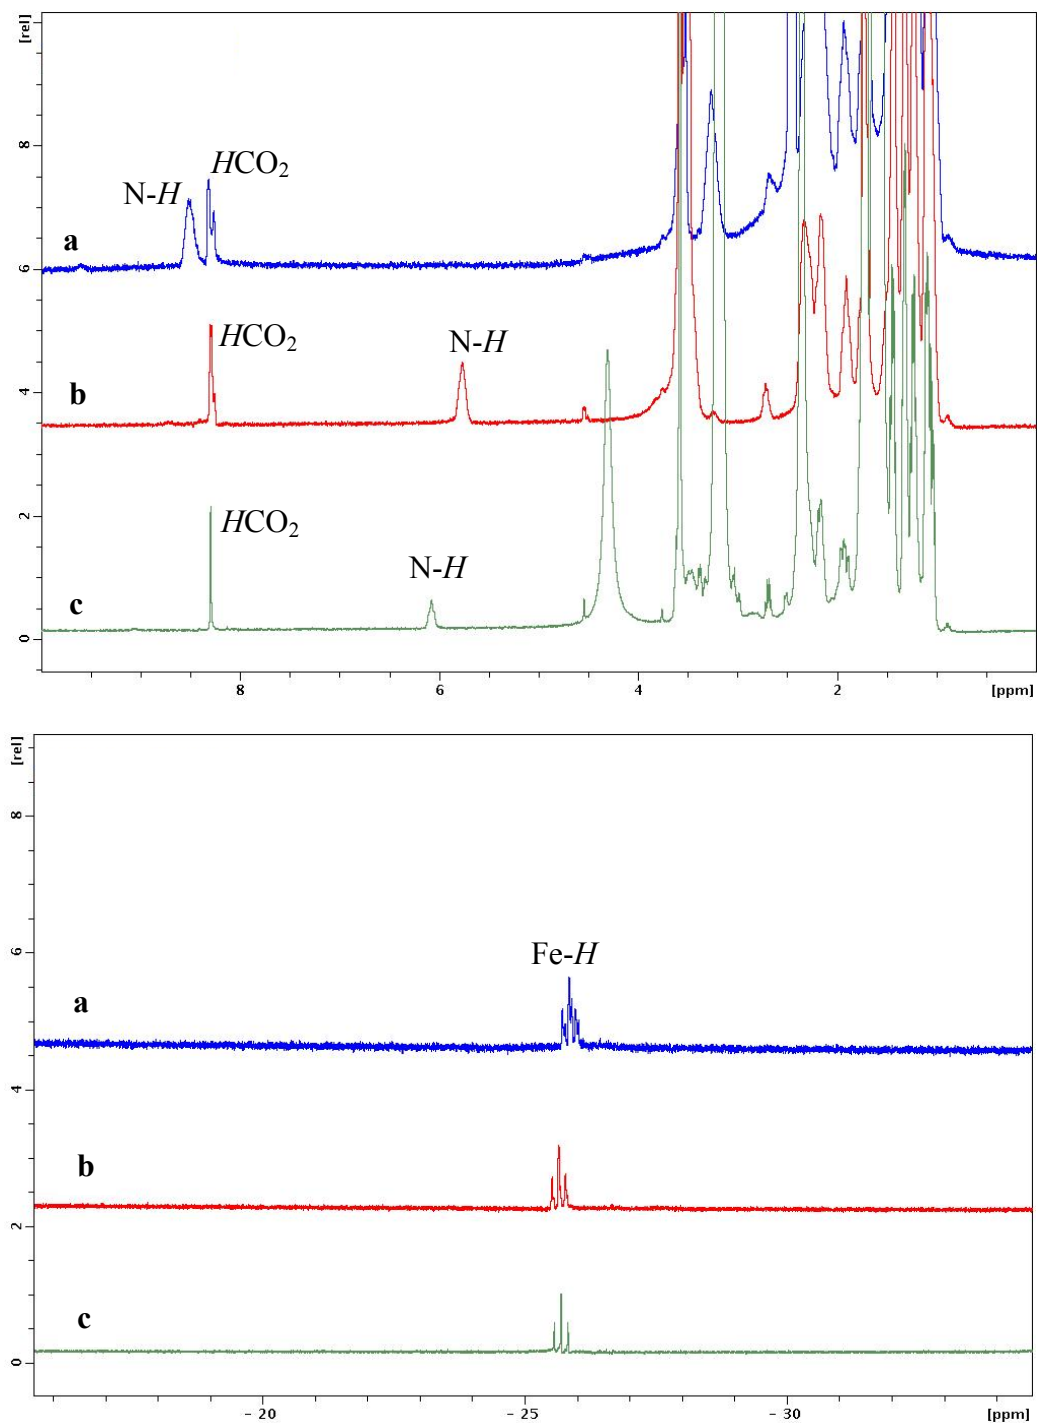

**Figure S1.** (a) <sup>1</sup>H NMR spectra of HCO<sub>2</sub>-1a, (b) after addition of 3 eq LiBF<sub>4</sub>, (c) after addition of 40 eq DBU.

**NMR scale catalytic CO<sub>2</sub> hydrogenation reaction with HCO<sub>2</sub>-1a.** A J. Young NMR tube was charged with 5 mg of **HCO<sub>2</sub>-1a** in approximately 1 mL of THF-*d*<sub>8</sub>. Then 3 eq of LiBF<sub>4</sub> and 40 eq of DBU were added to the sample. The sample was frozen at -198 °C, degassed, and 1 atm each of carbon dioxide and dihydrogen were admitted to the tube. The sample was warmed to ambient temperature and monitored by <sup>31</sup>P and <sup>1</sup>H NMR spectroscopy.

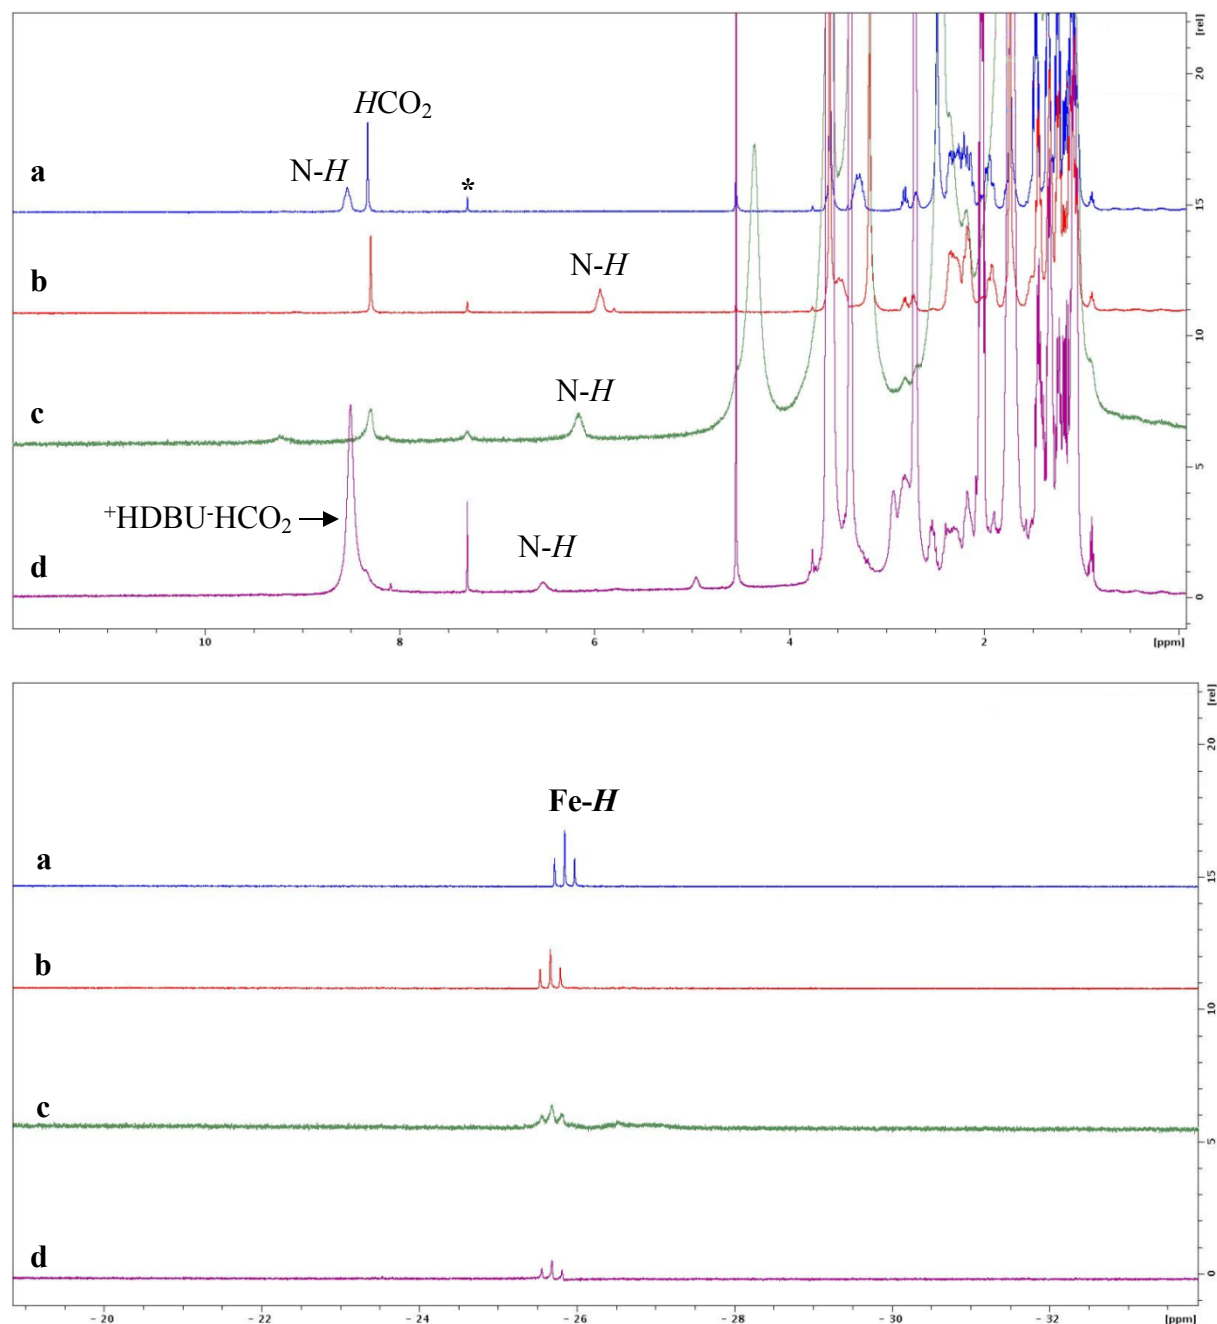

**Figure S2.** (a) <sup>1</sup>H NMR spectra of **HCO<sub>2</sub>-1a**, (b) after addition of 3 eq LiBF<sub>4</sub>, (c) after addition of 40 eq DBU, (d) 16 h after addition of 1 atm CO<sub>2</sub>/H<sub>2</sub>. \*denotes C<sub>6</sub>H<sub>6</sub> from glovebox atmosphere.

**NMR scale catalytic CO<sub>2</sub> hydrogenation reaction with 3a.** A J. Young NMR tube was charged with 6 mg of **3a** in approximately 1 mL of THF-*d*<sub>8</sub>. Then, 3 eq of LiBF<sub>4</sub> and 40 eq of DBU were added to the sample. The sample was frozen at -198 °C, degassed, and 1 atm each of carbon dioxide and dihydrogen were admitted to the tube. The sample was warmed to ambient temperature and monitored by <sup>31</sup>P and <sup>1</sup>H NMR spectroscopy.

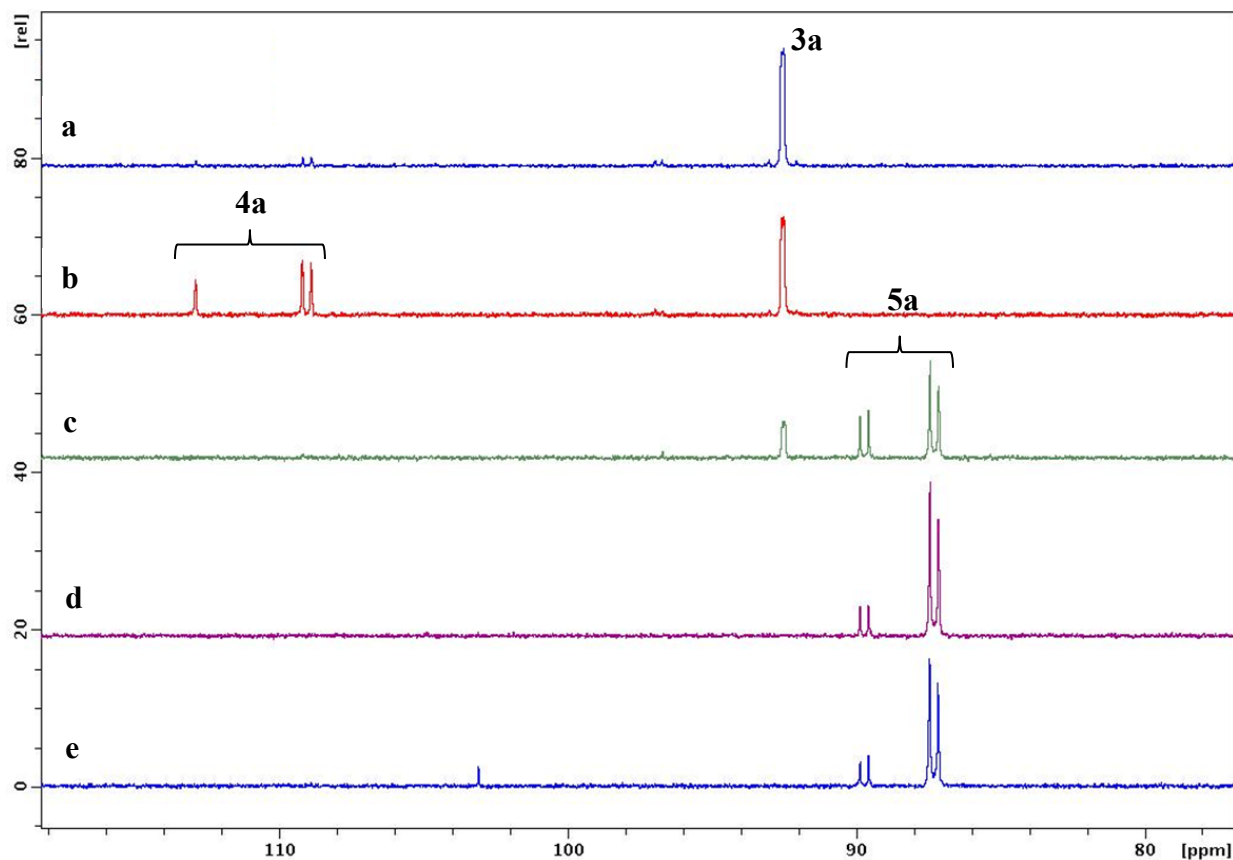

**Figure S3.** (a) <sup>31</sup>P NMR spectra of **3a**, (b) after addition of 3 eq LiBF<sub>4</sub>, (c) after addition of 40 eq DBU, (d) 1.5 h after addition of 1 atm CO<sub>2</sub>/H<sub>2</sub>, (e) 16 h after addition of 1 atm CO<sub>2</sub>/H<sub>2</sub>.

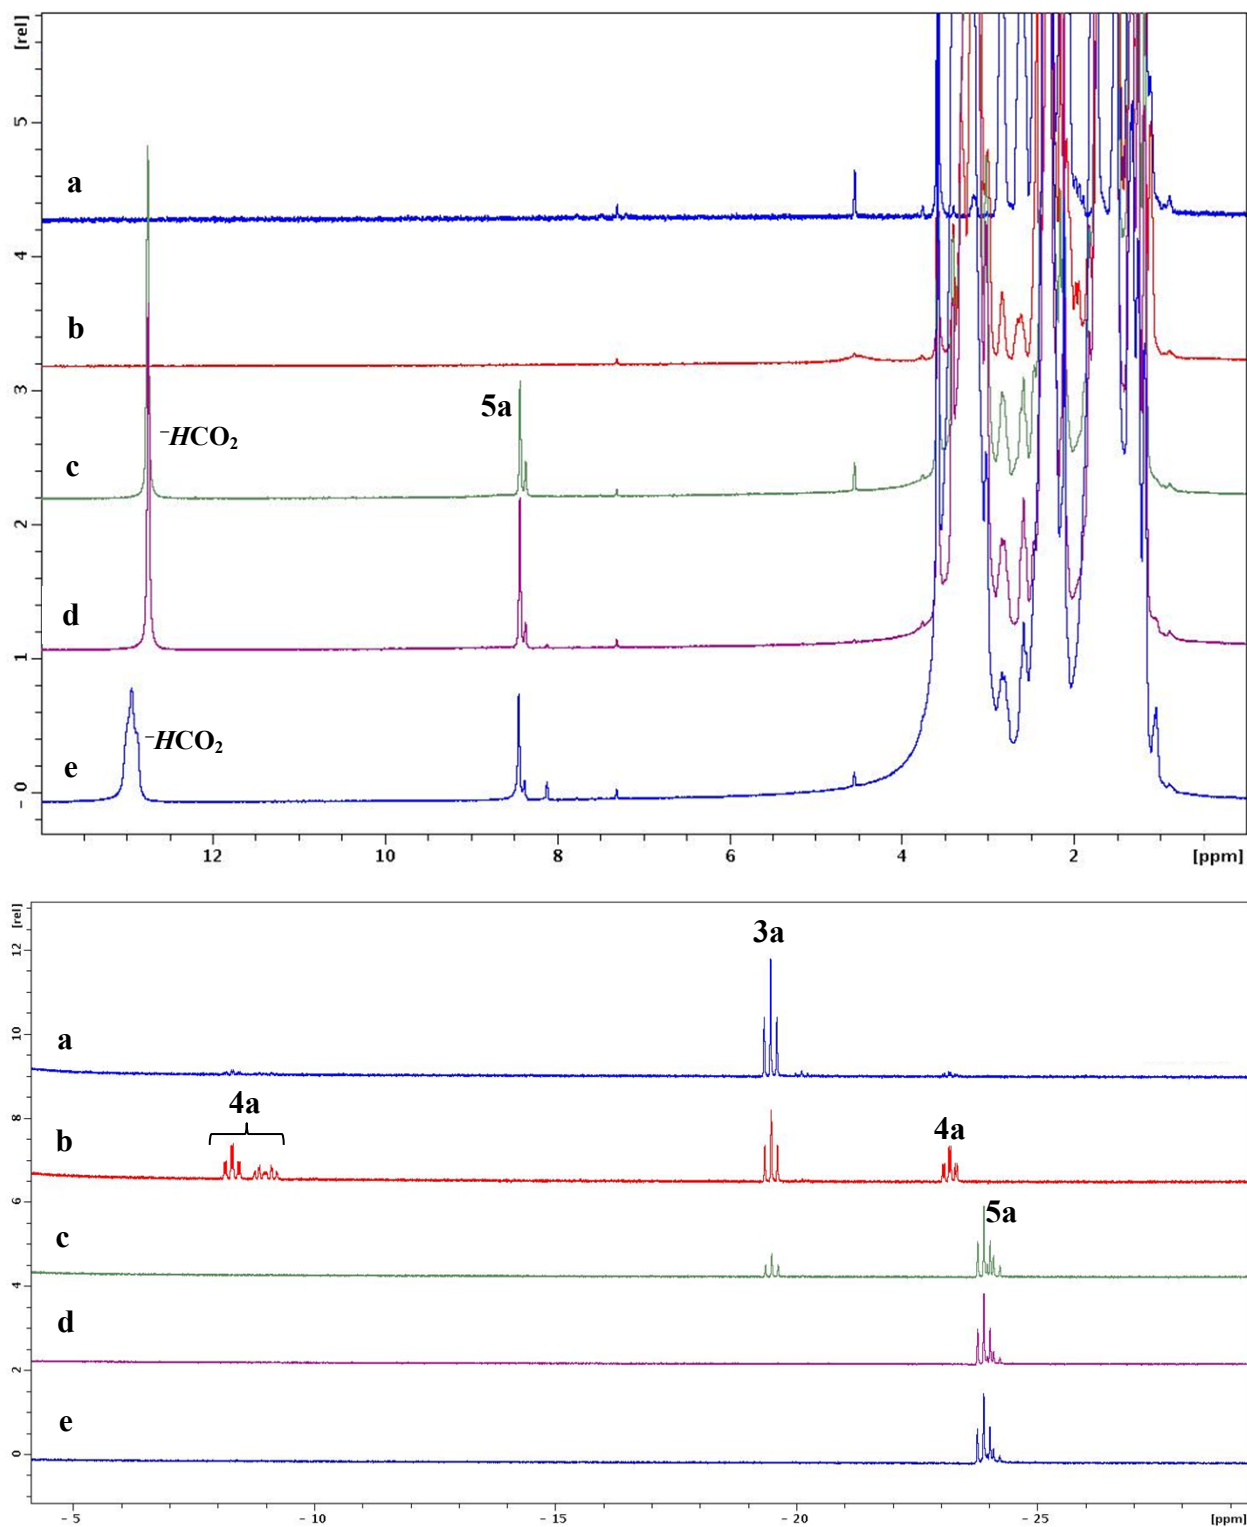

**Figure S4.** (a)  $^1\text{H}$  NMR spectra of **3a**, (b) after addition of 3 eq  $\text{LiBF}_4$ , (c) after addition of 40 eq DBU, (d) 1.5 h after addition of 1 atm  $\text{CO}_2/\text{H}_2$ , (e) 16 h after addition of 1 atm  $\text{CO}_2/\text{H}_2$ . Free formate ( $^+\text{HDBU}^-\text{HCO}_2$ ) is seen upon  $\text{CO}_2/\text{H}_2$  addition (d and e).

**NMR scale catalytic CO<sub>2</sub> hydrogenation reaction with 4a.** A J. Young NMR tube was charged with 6 mg of **4a** in approximately 1 mL of THF-*d*<sub>8</sub>. Then 3 eq of LiBF<sub>4</sub> and 40 eq of DBU were added to the sample. The sample was frozen at -198 °C, degassed, and 1 atm each of carbon dioxide and dihydrogen were admitted to the tube. The sample was warmed to ambient temperature and monitored by <sup>31</sup>P and <sup>1</sup>H NMR spectroscopy over the course of 16 hours.

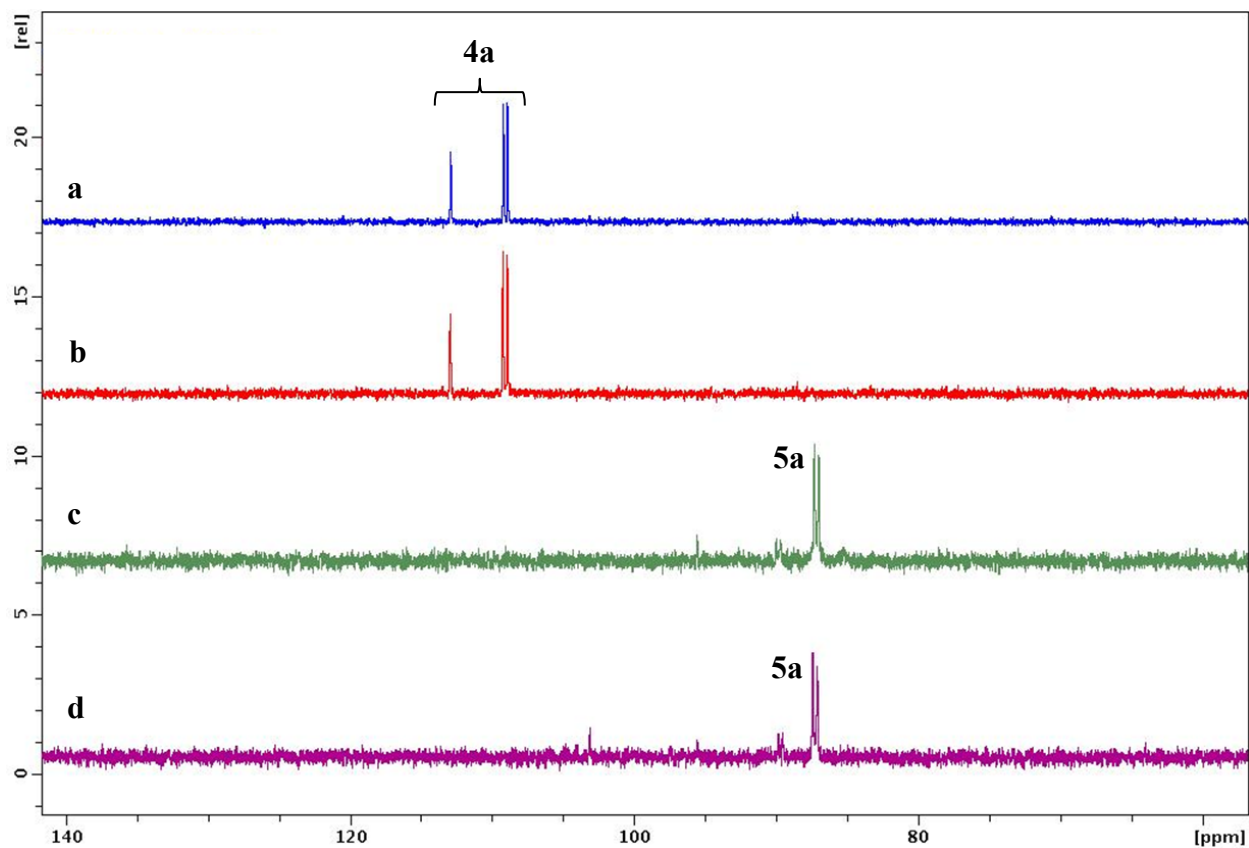

**Figure S5.** (a) <sup>31</sup>P NMR spectra of **4a**, (b) after addition of 3 eq LiBF<sub>4</sub> and 40 eq DBU, (c) 1.5 h after addition of 1 atm CO<sub>2</sub>/H<sub>2</sub>, (d) 16 h after addition of 1 atm CO<sub>2</sub>/H<sub>2</sub>.

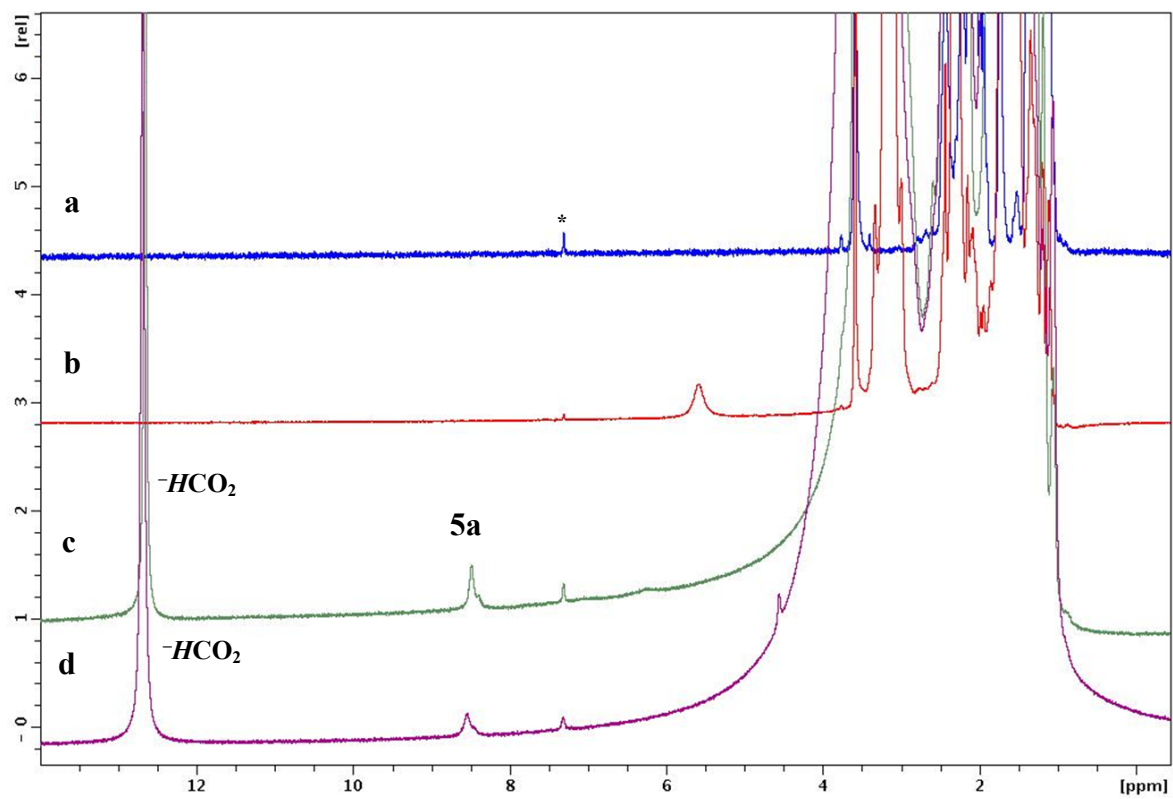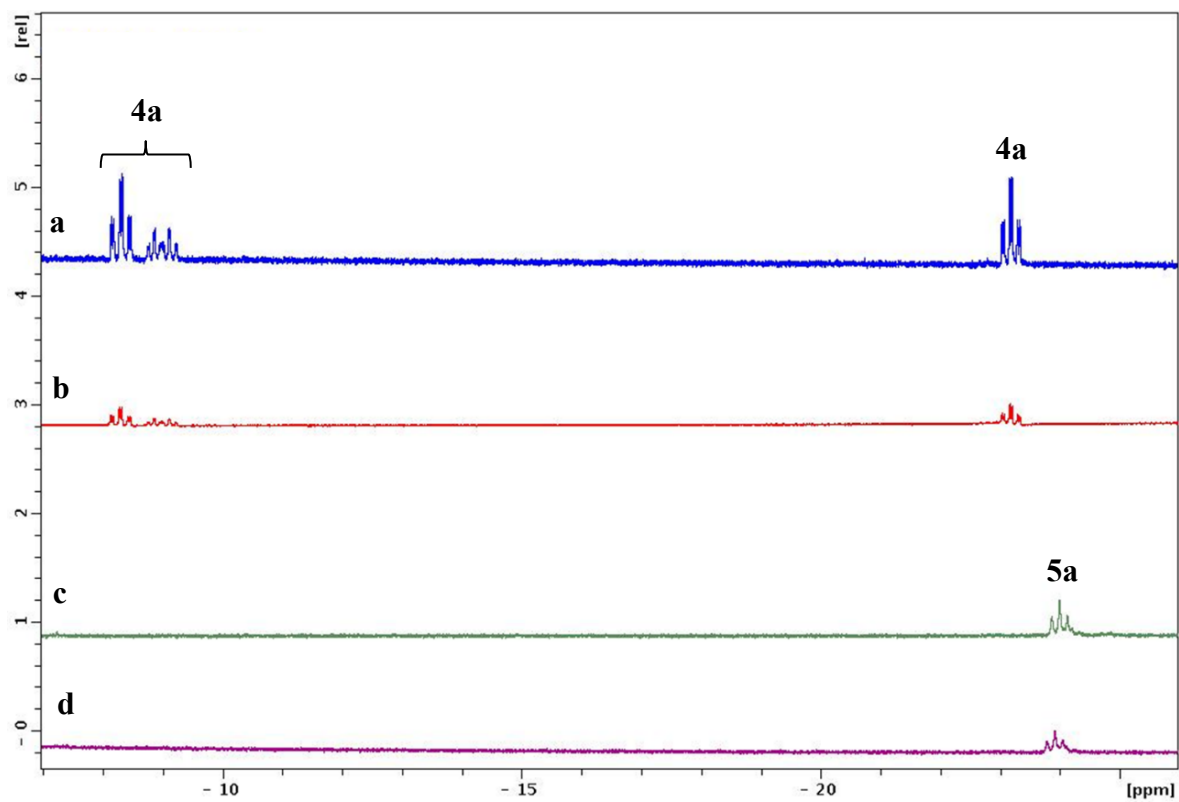

**Figure S6.** (a)  $^1\text{H}$  NMR spectra of **4a**, (b) after addition of 3 eq  $\text{LiBF}_4$  and 40 eq DBU, (c) 1.5 h after addition of 1 atm  $\text{CO}_2/\text{H}_2$ , (d) 16 h after addition of 1 atm  $\text{CO}_2/\text{H}_2$ .

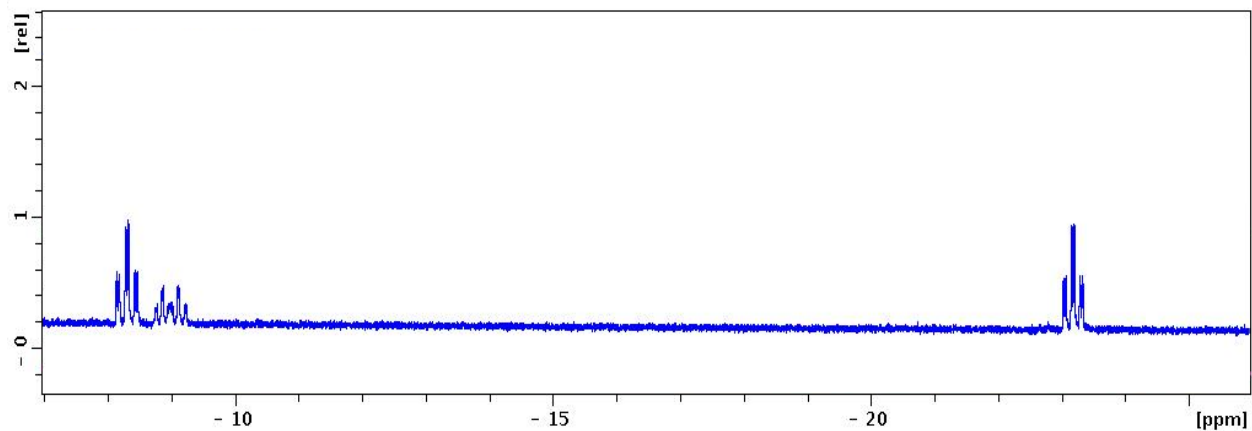

**Figure S7.** Partial  $^1\text{H}$  NMR spectrum for **4a** showing the *cis*- and *trans*-isomers in  $\text{C}_6\text{D}_6$ .

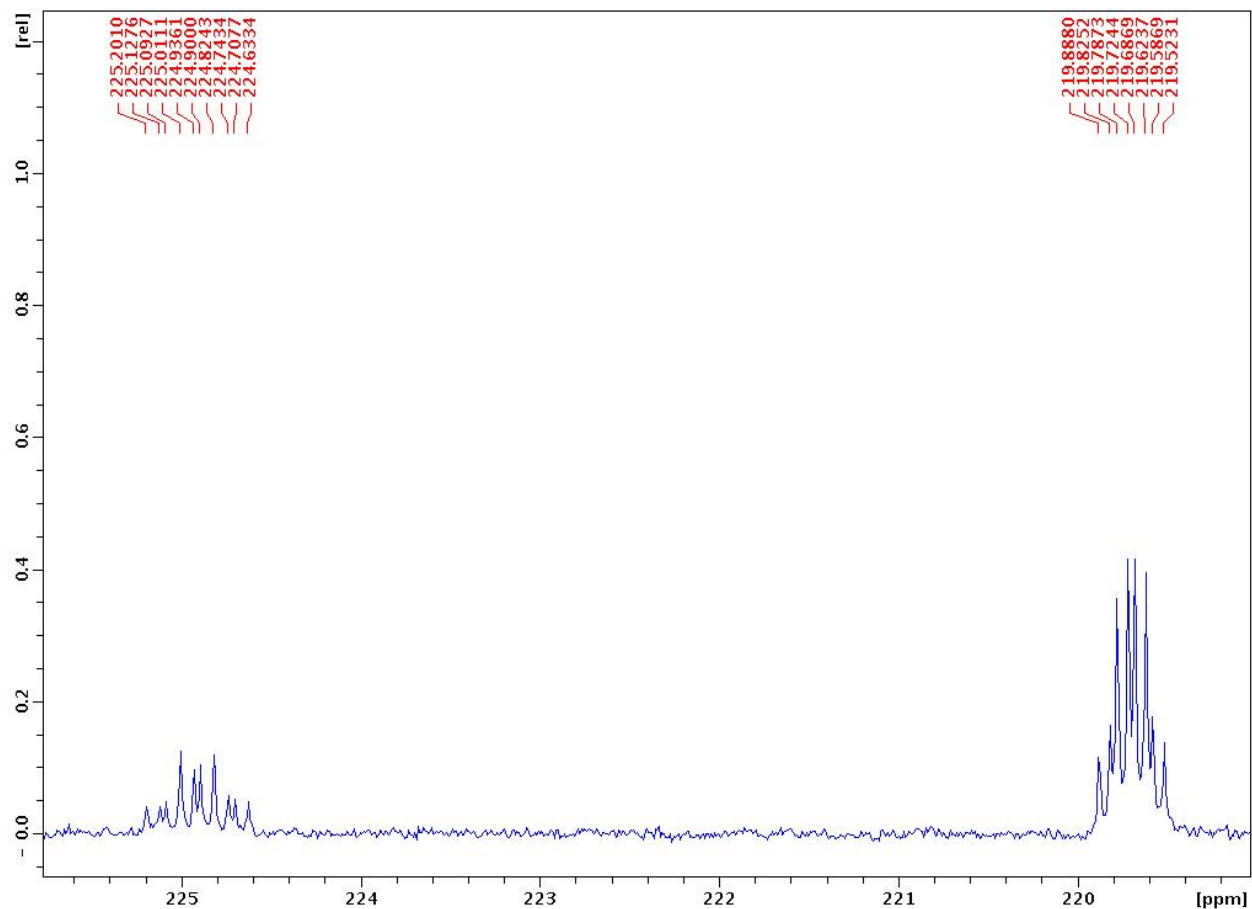

**Figure S8.** Partial  $^1\text{H}$ -coupled  $^{13}\text{C}$  NMR spectrum of  $(^i\text{PrPN}^{\text{Me}}\text{P})\text{Fe}(\text{H})_2^{13}\text{CO}$  (**4a**) showing *cis*- and *trans*-isomers in  $\text{C}_6\text{D}_6$ .

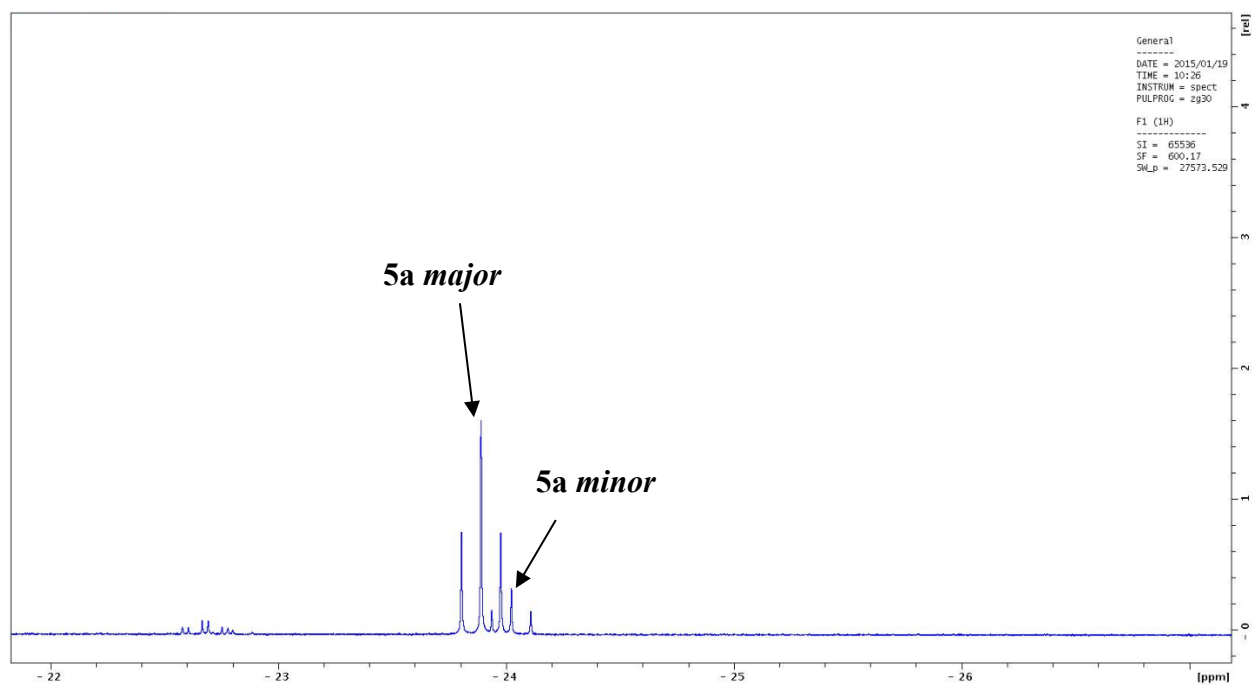

**Figure S9.** Partial  $^1\text{H}$  NMR spectrum for **5a** showing major and minor isomers in  $\text{C}_6\text{D}_6$ . Note: **4a** present in small amount at -22.7 ppm.

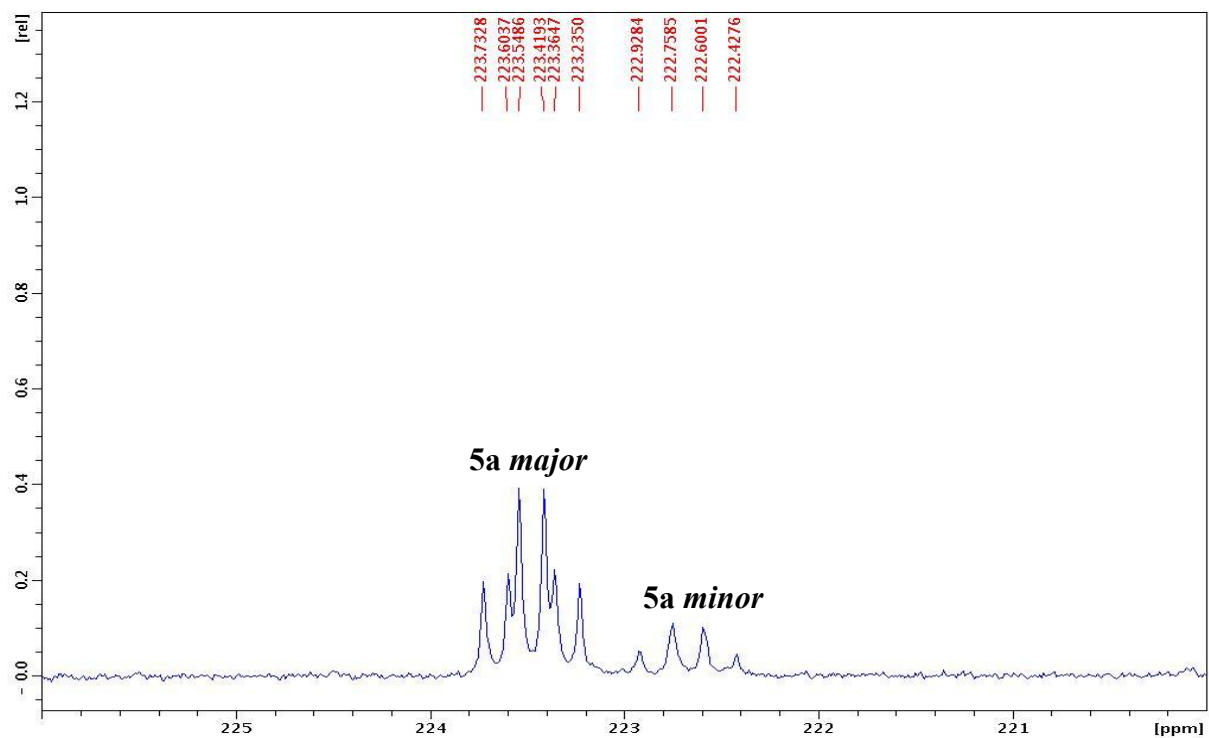

**Figure S10.** Partial  $^1\text{H}$ -coupled  $^{13}\text{C}$  NMR spectrum of  $(\text{iPrPN}^{\text{MeP}})\text{Fe}(\text{H})^{13}\text{CO}(\text{HCO}_2)$  (**5a**) showing major and minor isomers in  $\text{C}_6\text{D}_6$ .



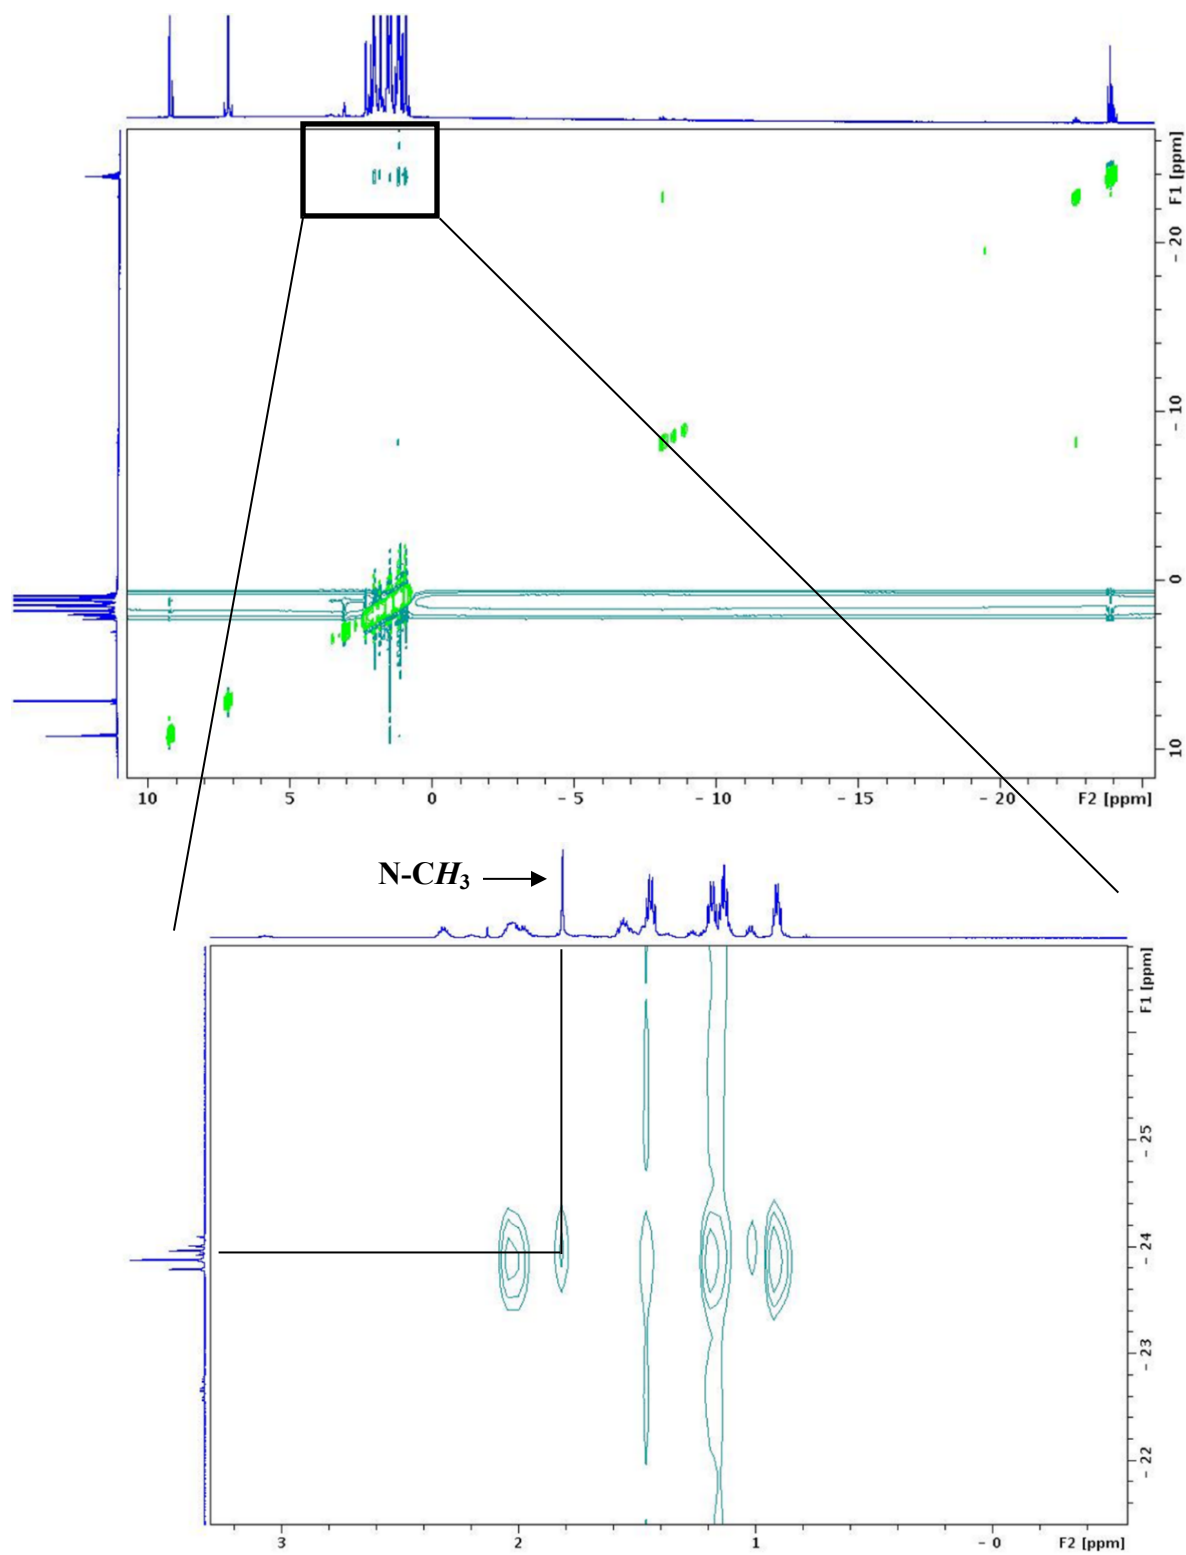

**Figure S11.** NOESY NMR spectrum for **5a** in  $C_6D_6$  (mixing time 300ms at 22 °C).

**Treatment of 5a with DBU, H<sub>2</sub> and LiBF<sub>4</sub>.** A J. Young NMR tube was charged with 3 mg of **5a** in approximately 1 mL of THF-*d*<sub>8</sub>. 5 eq of DBU were added to the sample, then the tube was frozen at -198 °C, degassed, and 1 atm of dihydrogen was admitted. The sample was warmed to ambient temperature and monitored by <sup>31</sup>P and <sup>1</sup>H NMR spectroscopy. After 16 h, 3 eq of LiBF<sub>4</sub> was added to the sample and the dihydrogen atmosphere recharged.

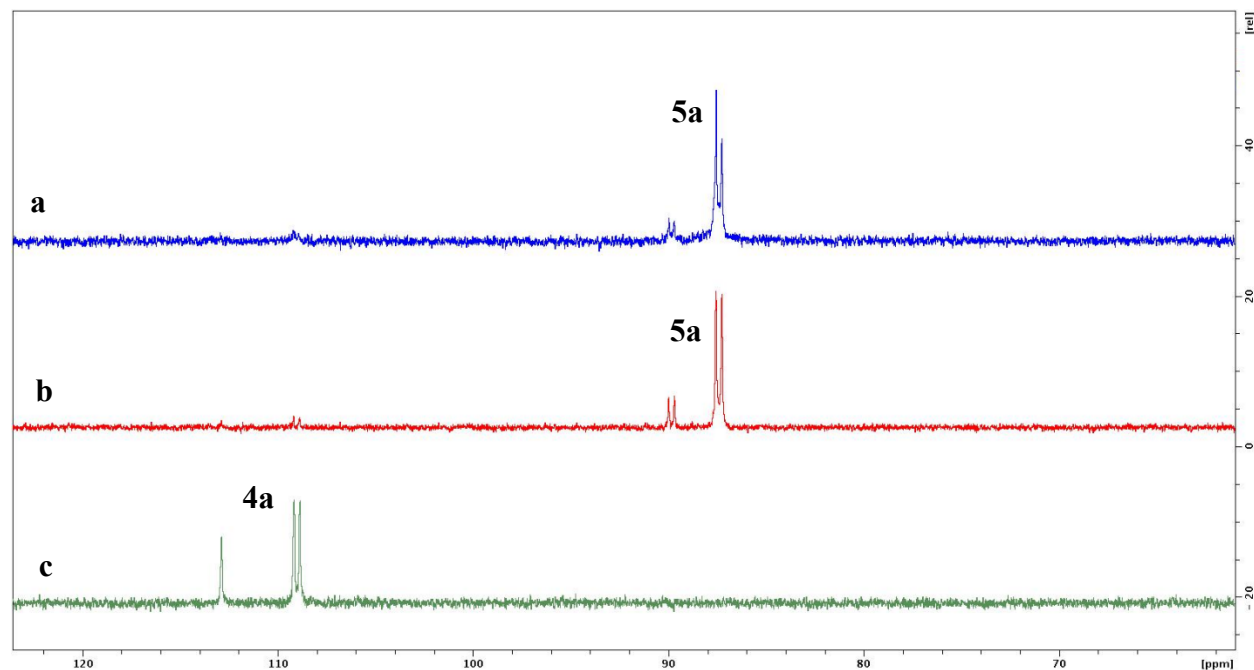

**Figure S12.** (a) <sup>31</sup>P NMR spectra of **5a**, (b) 16 h after addition of 5 eq DBU and 1 atm H<sub>2</sub>, (c) 10 min after addition of 3 eq LiBF<sub>4</sub>.

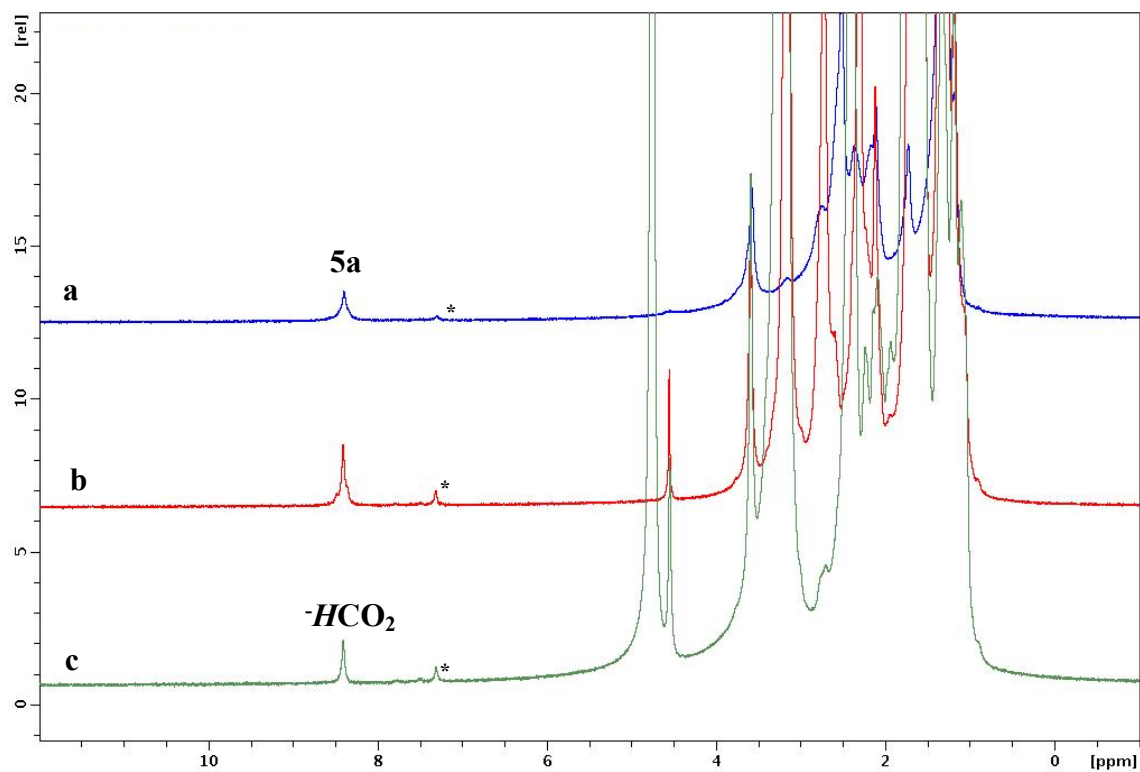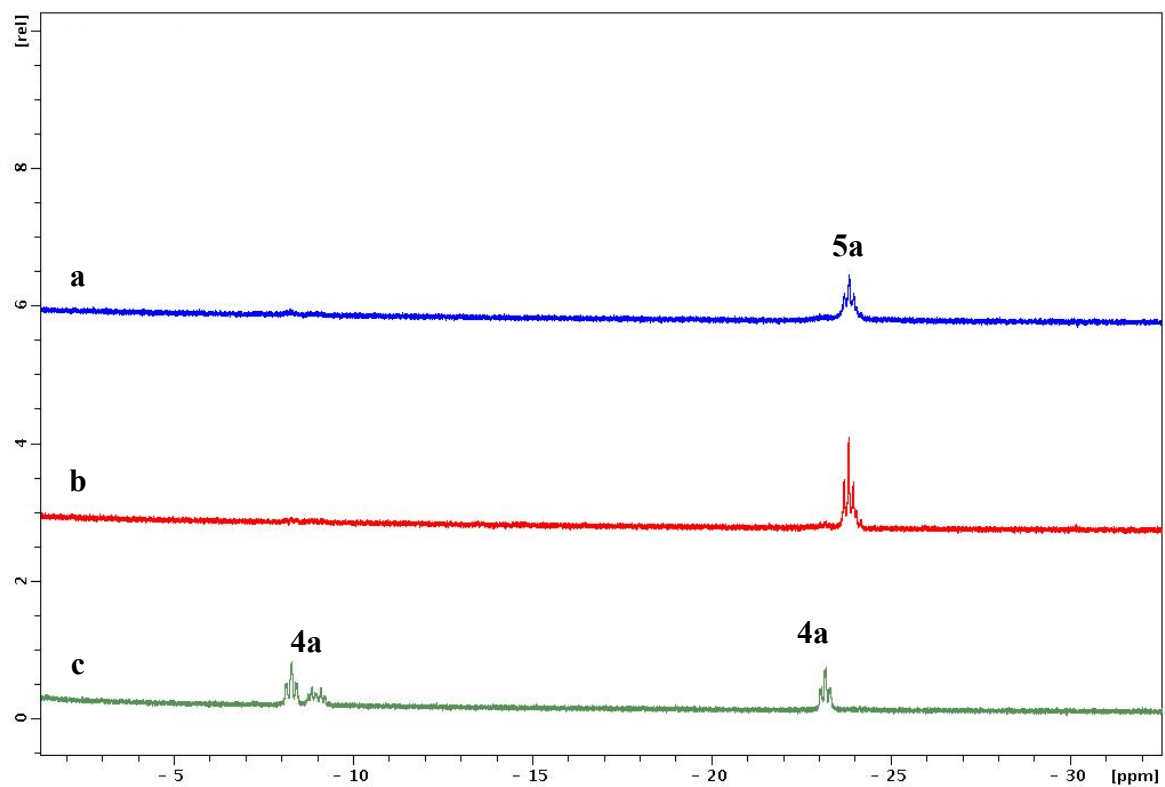

**Figure S13.** (a)  $^{31}\text{P}$  NMR spectra of **5a**, (b) 16 h after addition of 5 eq DBU and 1 atm  $\text{H}_2$ , (c) 10 min after addition of 3 eq  $\text{LiBF}_4$ . Free formate ( $^+\text{HDBU}^- \text{HCO}_2$ ) is seen upon  $\text{CO}_2/\text{H}_2$  addition (c). \* denotes  $\text{C}_6\text{H}_6$  from glovebox atmosphere.

**Treatment of 5a with LiBF<sub>4</sub>.** A J. Young NMR tube was charged with 3 mg of **5a** in approximately 1 mL of THF-*d*<sub>8</sub>. Then 3 eq of LiBF<sub>4</sub> was added under an N<sub>2</sub> atmosphere and the sample monitored by <sup>31</sup>P and <sup>1</sup>H NMR spectroscopy.

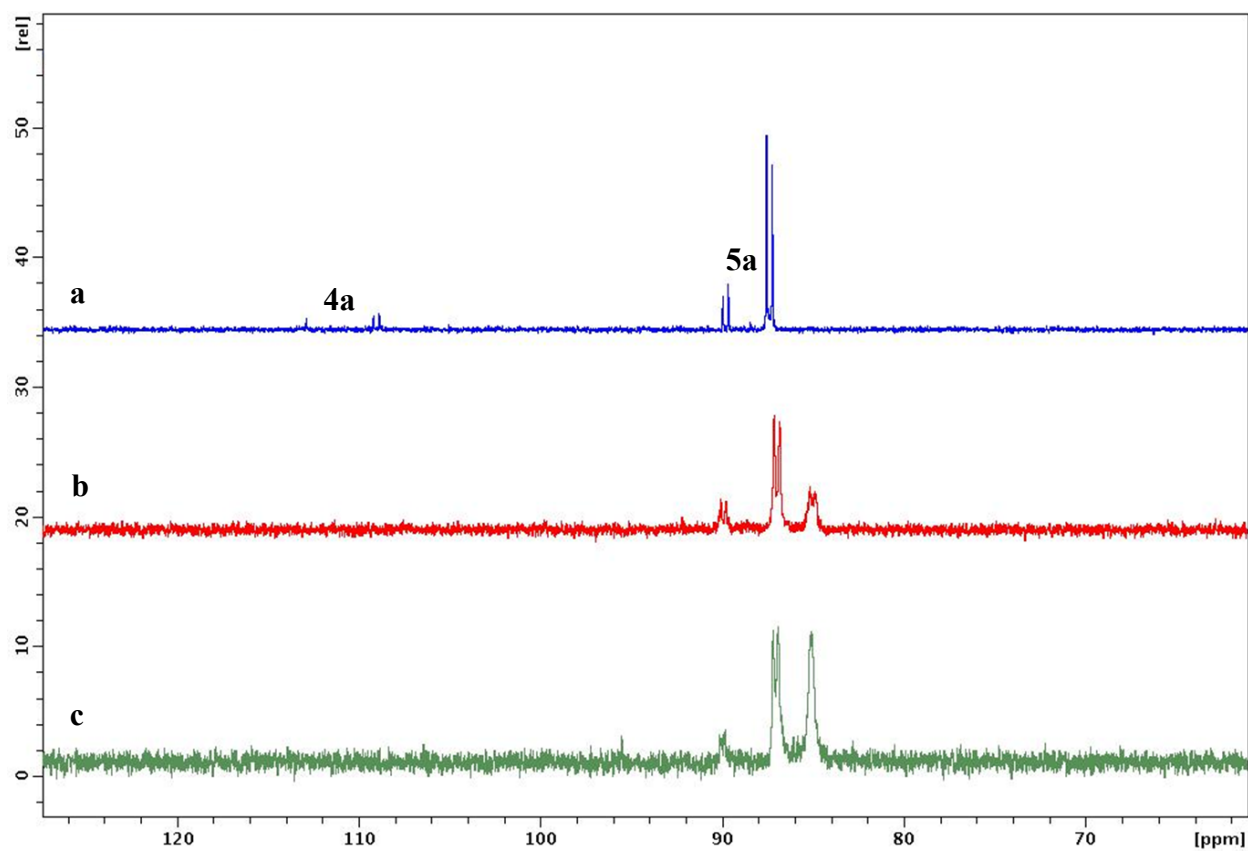

**Figure S14.** (a) <sup>31</sup>P NMR spectra of **5a**, (b) 10 min after addition of 3 eq LiBF<sub>4</sub>, (c) 2 h after addition of 3 eq LiBF<sub>4</sub>. Note: **4a** present in small amount in (a).

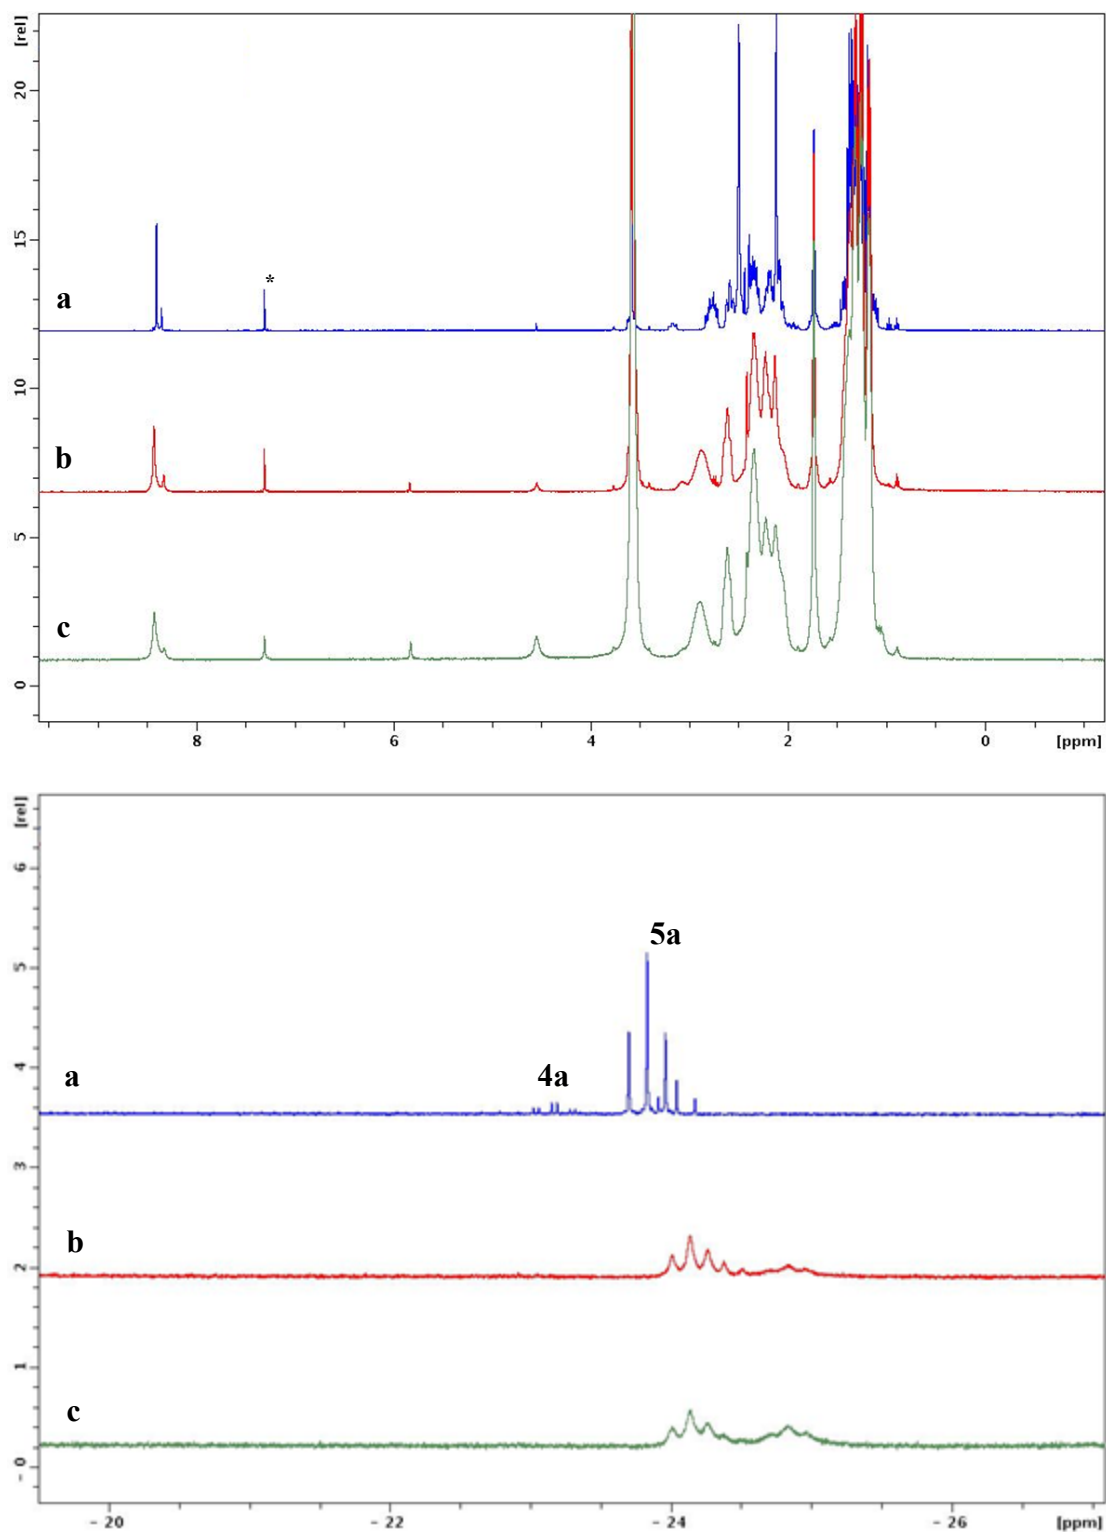

**Figure S15.** (a)  $^1\text{H}$  NMR spectra of **5a**, (b) 10 min after addition of 3 eq  $\text{LiBF}_4$ , (c) 2 h after addition of 3 eq  $\text{LiBF}_4$ . Note: **4a** present in small amount in (a), \* denotes  $\text{C}_6\text{H}_6$  from glovebox atmosphere.

## X-ray Crystallography

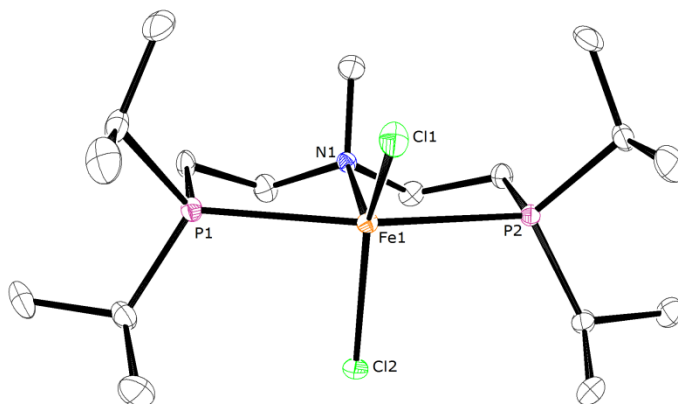

**Figure S16.** Molecular structures of (iPrPN<sup>Me</sup>P)FeCl<sub>2</sub> at 30% ellipsoids. Hydrogen atoms not attached to iron or boron have been removed for clarity. Selected bond lengths (Å) and angles (°): Fe(1)-P(1) 2.5749(8), Fe(1)-P(2) 2.5738(7), Fe(1)-N(1) 2.222(2), Fe(1)-Cl(1) 2.2937(7), Fe(1)-Cl(2) 2.3505(7), P(1)-Fe(1)-P(2) 162.68(3), Cl(1)-Fe(1)-Cl(2) 140.42(3).

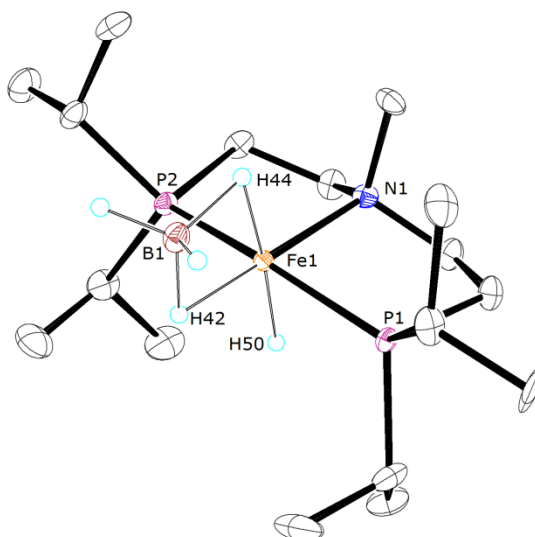

**Figure S17.** Molecular structures of (iPrPN<sup>Me</sup>P)Fe(H)BH<sub>4</sub> at 30% ellipsoids. Hydrogen atoms not attached to iron or boron have been removed for clarity. Selected bond lengths (Å) and angles (°) (iPrPN<sup>Me</sup>P)Fe(H)BH<sub>4</sub>: Fe(1)-P(1) 2.193(2), Fe(1)-P(2) 2.183(2), Fe(1)-N(1) 2.079(2), Fe(1)-H(42) 1.62(6), Fe(1)-H(44) 1.67(5), Fe(1)-H(50) 1.58(5), P(1)-Fe(1)-P(2) 165.34(6), H(42)-B(1)-H(44) 105(4).

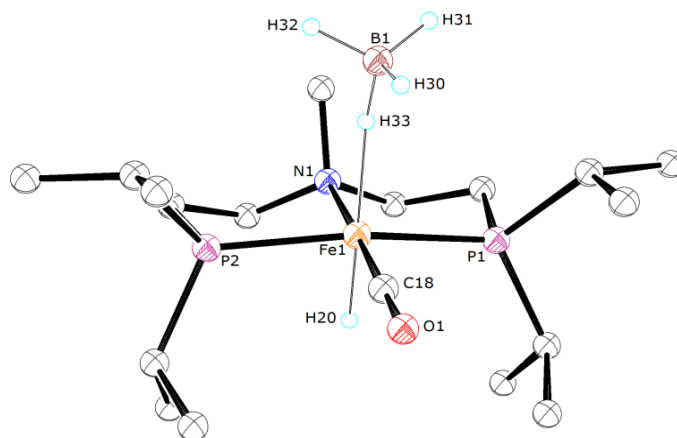

**Figure S18.** Molecular structure of **3a** at 30% ellipsoids. Hydrogen atoms not attached to iron or boron have been removed for clarity. Selected bond lengths (Å) and angles (°) for **3a**: Fe(1)-P(1) 2.2034(6), Fe(1)-P(2) 2.2031(7), Fe(1)-N(1) 2.136(1), Fe(1)-H(20) 1.47(2), Fe(1)-H(33) 1.81(3), Fe(1)-C(18) 1.728(2), C(18)-O(1) 1.162(2), P(1)-Fe(1)-P(2) 165.45(3), N(1)-Fe(1)-C(18) 177.55(7).

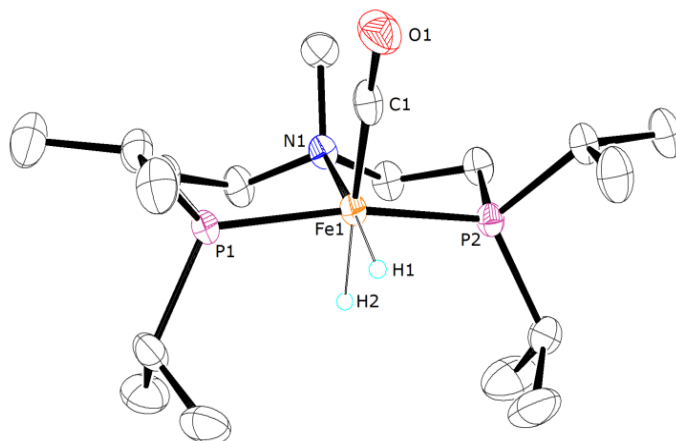

**Figure S19.** Molecular structure **4a** at 30% ellipsoids. Hydrogen atoms not attached to iron have been removed for clarity. Selected bond lengths (Å) and angles (°): Fe(1)-P(1) 2.1622(8), Fe(1)-P(2) 2.1583(8), Fe(1)-N(1) 2.123(2), Fe(1)-H(1) 1.51(2), Fe(1)-H(2) 1.42(3), Fe(1)-C(1) 1.748(3), C(1)-O(1) 1.134(4), P(1)-Fe(1)-P(2) 165.13(3), N(1)-Fe(1)-H(1) 171.8(9), C(1)-Fe(1)-H(2) 170(1).

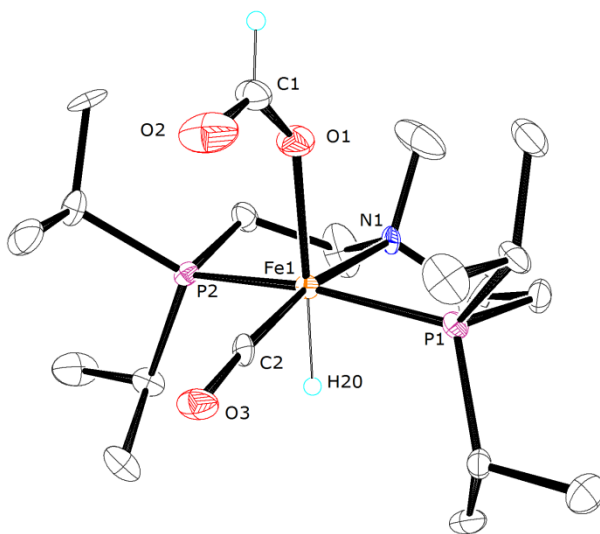

**Figure S20.** Molecular structure of **5a** at 30% ellipsoids. The hydrogen atom attached to iron was freely refined while that attached to C(1) was calculated. All other hydrogen atoms have been removed for clarity. Selected bond lengths (Å) and angles (°) for **3a**: Fe(1)-P(1) 2.212(3), Fe(1)-P(2) 2.227(3), Fe(1)-N(1) 2.14(1), Fe(1)-H(20) 1.40(8), Fe(1)-C(2) 1.68(1), Fe(1)-O(1) 2.019(8), C(2)-O(3) 1.19(2), C(1)-O(1) 1.27(2), C(1)-O(2) 1.20(2), P(1)-Fe(1)-P(2) 163.8(1), N(1)-Fe(1)-C(2) 168.8(5); O(1)-Fe(1)-H(20) 177(4).

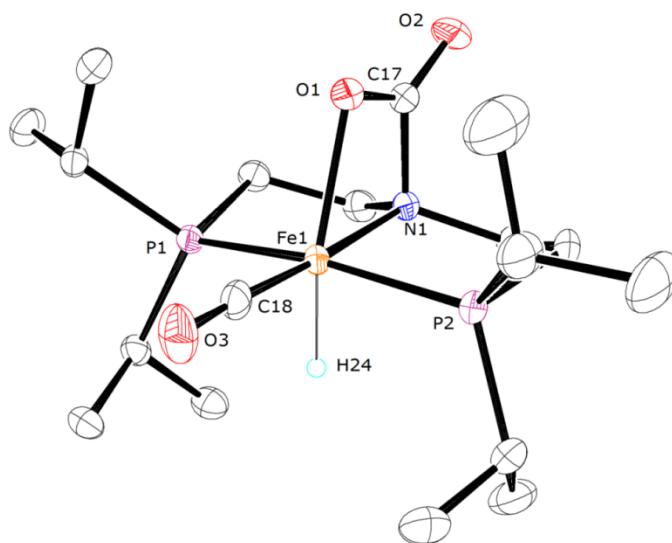

**Figure S21.** Molecular structure of **CO<sub>2</sub>-1a** at 30% ellipsoids. Hydrogen atoms not attached to iron and a co-crystallized pentane molecule have been removed for clarity. Selected bond lengths (Å) and angles (°): Fe(1)-P(1) 2.2104(9), Fe(1)-P(2) 2.2051(9), Fe(1)-N(1) 2.037(2), Fe(1)-C(18) 1.720(3), Fe(1)-H(24) 1.45(3), Fe(1)-O(1) 2.113(2), C(17)-O(1) 1.262(4), C(17)-O(2) 1.212(4), C(17)-N(1) 1.513(4), C(18)-O(3) 1.167(4), P(1)-Fe(1)-P(2) 164.85(4), N(1)-Fe(1)-C(18) 175.1(1), N(1)-Fe(1)-O(1) 65.75(9), O(1)-C(17)-O(2) 131.9(3).



## References

1. (a) Werkmeister, S.; Junge, K.; Wendt, B.; Alberico, E.; Jiao, H.; Baumann, W.; Junge, H.; Gallou, F.; Beller, M. *Angew. Chem. Int. Ed.* **2014**, *53*, 8722; (b) Bornschein, C.; Werkmeister, S.; Wendt, B.; Jiao, H.; Alberico, E.; Baumann, W.; Junge, H.; Junge, K.; Beller, M. *Nat. Commun.* **2014**, *5*, 4111; (c) Koehne, I.; Schmeier, T. J.; Bielinski, E. A.; Pan, C. J.; Lagaditis, P. O.; Bernskoetter, W. H.; Takase, M. K.; Würtele, C.; Hazari, N.; Schneider, S. *Inorg. Chem.* **2014**, *53*, 2133.
2. Pangborn, A. B.; Giardello, M. A.; Grubbs, R. H.; Rosen, R. K.; Timmers, F. J. *Organometallics* **1996**, *15*, 1518.
3. Sandström, J. *Dynamic NMR Spectroscopy*; Academic Press: New York, 1982.
